# Supplementary material for: Catalytic Oxidation of Benzene over Atomic Active Site AgNi/BCN Catalysts at Room Temperature
Source: MDPI journal article supplement (doi:10.3390/molecules29071463), 2024-03-25
Supplement: s1 [file s1]

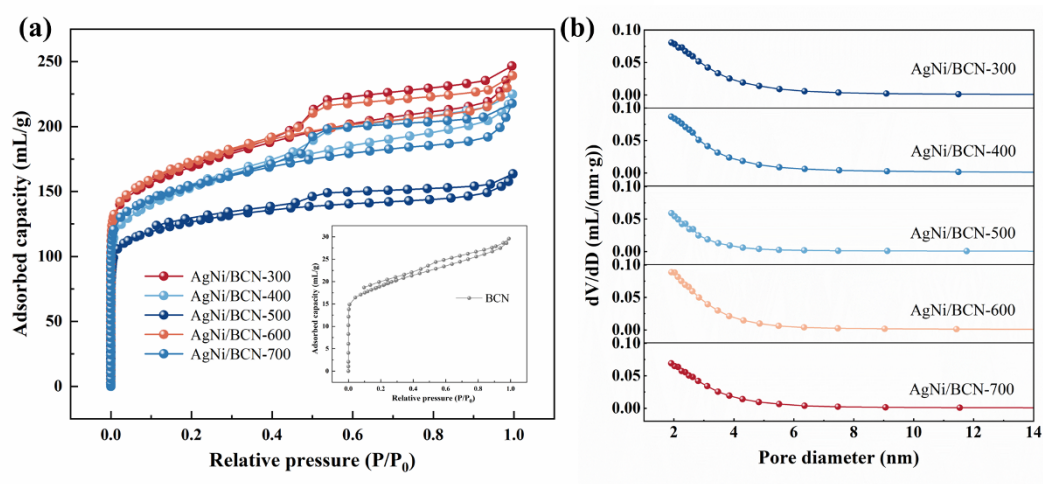

Figure S1 N<sub>2</sub> adsorption-desorption experiments: (a) N<sub>2</sub> adsorption-desorption isotherms; (b) Pore size distribution.

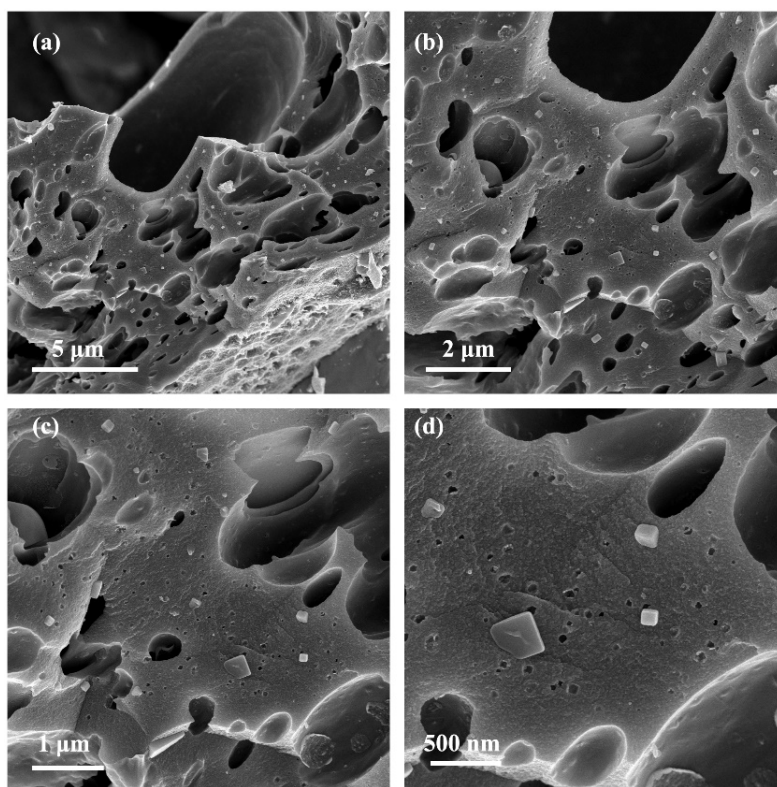

Figure S2 SEM images of BCN aerogel carrier.

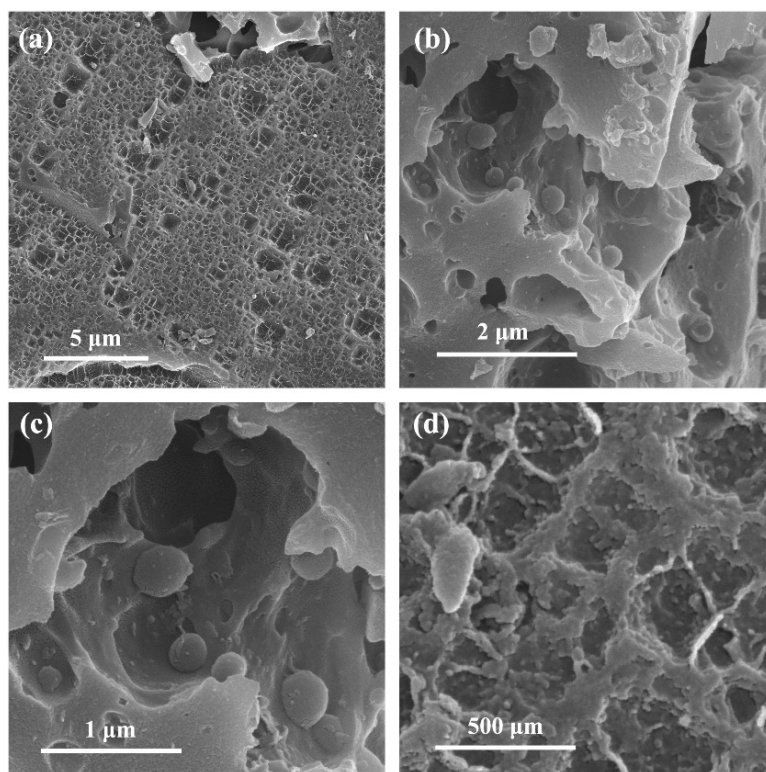

Figure S3 SEM images of AgNi/BCN-400 catalyst.

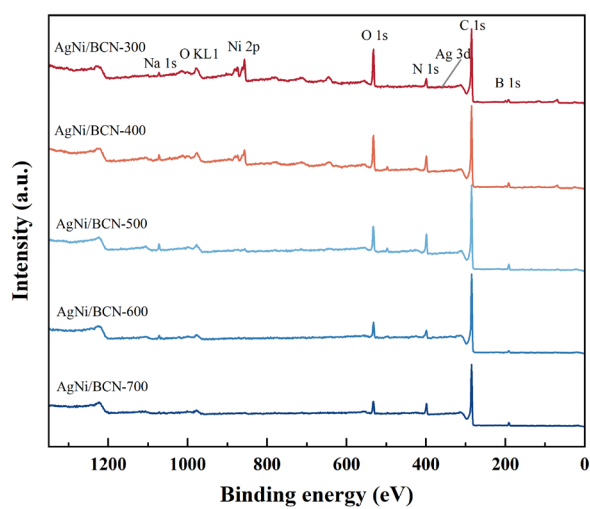

Figure S4 XPS survey scan of AgNi/BCN-X catalysts.

Table. S1 Experimental agents

| Reagent                                                       | Concentration | Reagent                                                        | Concentration |
|---------------------------------------------------------------|---------------|----------------------------------------------------------------|---------------|
| C <sub>6</sub> H <sub>6</sub>                                 | AR (≥99.5%)   | Na <sub>2</sub> CO <sub>3</sub> ·10H <sub>2</sub> O            | 98%           |
| (C <sub>6</sub> H <sub>10</sub> O <sub>5</sub> ) <sub>n</sub> | BR            | H <sub>2</sub> PtCl <sub>6</sub> ·6H <sub>2</sub> O            | AR            |
| CH <sub>4</sub> N <sub>2</sub> O                              | AR (≥99.5%)   | AuCl <sub>4</sub> H                                            | 97%           |
| H <sub>3</sub> BO <sub>3</sub>                                | 99.5%         | C <sub>14</sub> H <sub>10</sub> Fe <sub>2</sub> O <sub>4</sub> | >96.0%(T)     |
| Ni(NO <sub>3</sub> ) <sub>2</sub> ·6H <sub>2</sub> O          | AR (≥98.0%)   | N <sub>2</sub>                                                 | 99.999%       |
| NaCl                                                          | AR            | He                                                             | 5N            |
| AgNO <sub>3</sub>                                             | AR (≥99.0%)   | H <sub>2</sub> /N <sub>2</sub>                                 | 5N            |
| HNO <sub>3</sub>                                              | AR            | N <sub>2</sub>                                                 | 5N            |

Table. S2 Relative content of oxygen species in AgNi/BCN-X catalysts.

| Samples      | O <sub>latt</sub> | O <sub>ads</sub> | Adsorbed water species | O <sub>ads</sub> /O <sub>latt</sub> |
|--------------|-------------------|------------------|------------------------|-------------------------------------|
| AgNi/BCN-300 | 4.17              | 39.49            | 56.33                  | 9.45                                |
| AgNi/BCN-400 | 4.30              | 42.29            | 53.42                  | 9.84                                |
| AgNi/BCN-500 | 4.61              | 25.62            | 69.77                  | 5.56                                |
| AgNi/BCN-600 | 5.92              | 40.14            | 53.93                  | 6.78                                |
| AgNi/BCN-700 | 11.34             | 35.56            | 53.10                  | 3.14                                |

Table. S3 Relative content of boron species in AgNi/BCN-X catalysts.

| Samples      | B-C   | B-N   | B-O   |
|--------------|-------|-------|-------|
| AgNi/BCN-300 | 11.11 | 44.44 | 44.44 |
| AgNi/BCN-400 | 12.74 | 51.38 | 35.88 |
| AgNi/BCN-500 | 11.14 | 42.71 | 46.14 |
| AgNi/BCN-600 | 12.16 | 78.83 | 9.01  |
| AgNi/BCN-700 | 12.02 | 73.01 | 14.96 |
